# Supplementary material for: Untargeted MS-Based Metabolomic Analysis of Termite Gut-Associated Streptomycetes with Antifungal Activity against Pyrrhoderma noxium
Source: MDPI journal article supplement (doi:10.3390/antibiotics12091373), 2023-08-28
Supplement: s1 [file s1]

# Untargeted MS-based Metabolomic Analysis of Termite Gut-Associated Streptomycetes with Antifungal Activity against *Pyrrhoderma noxium*

Cherrihan Adra <sup>1</sup>, Trong D. Tran <sup>2</sup>, Keith Foster <sup>3</sup>, Russell Tomlin <sup>3</sup> and D. İpek Kurtböke <sup>1,\*</sup>

<sup>1</sup> School of Science, Technology and Engineering, University of the Sunshine Coast, Maroochydore BC, QLD 4558, Australia; cherrihan.adra@research.usc.edu.au (C.A.); ttran1@usc.edu.au (T.D.T.)

<sup>2</sup> Centre for Bioinnovation, University of the Sunshine Coast, Sippy Downs, QLD 4556, Australia

<sup>3</sup> Brisbane City Council, Program, Planning and Integration, Brisbane Square, Level 10, 266 George Street, Brisbane, QLD 4000, Australia; kfosteradsl@bigpond.com (K.F.); russell.tomlin@brisbane.qld.gov.au (R.T.)

\* Correspondence: ikurtbok@usc.edu.au

## Supplementary material

GNPS molecular networking job link: ID=61d105da9f264f26be65600a18d777b7

## Tables:

**Table S1.** Termite gut-associated actinomycete isolates phylogeny and morphology

| Strain code | Closest related species                         | %Identity | Reference Accession number | Morphology                                                                            |
|-------------|-------------------------------------------------|-----------|----------------------------|---------------------------------------------------------------------------------------|
| USC-590     | <i>Micromonospora chalcea</i> strain IMB16-203  | 100%      | MG190678.1                 |  |
| USC-591     | <i>Micromonospora chalcea</i> strain IMB16-203  | 99.92%    | MG190678.1                 |  |
| USC-592     | <i>Streptomyces albiaxisialis</i> strain VLK-10 | 100%      | KP170480.1                 |  |

|          |                                                      |        |            |                                                                                       |
|----------|------------------------------------------------------|--------|------------|---------------------------------------------------------------------------------------|
| USC-593  | <i>Micromonospora chalcea</i><br>strain IMB16-203    | 100%   | MG190678.1 |    |
| USC-595A | <i>Streptomyces puniceus</i><br>strain IIPR:KR01:01  | 100%   | MK825538.2 |    |
| USC-595B | <i>Streptomyces platensis</i><br>strain HBUM174787   | 100%   | FJ486385.1 |    |
| USC-595C | <i>Streptomyces diastaticus</i><br>strain FJAT-31547 | 100%   | MH084838.1 |  |
| USC-596  | <i>Streptomyces laurentii</i><br>strain SNP3         | 99.92% | MZ389926.1 |  |
| USC-597  | <i>Streptomyces cirratus</i><br>strain BS32          | 100%   | KR063212.1 |  |

|           |                                                   |        |             |                                                                                       |
|-----------|---------------------------------------------------|--------|-------------|---------------------------------------------------------------------------------------|
| USC-598   | <i>Streptomyces</i> sp. strain ZMR2-66            | 100%   | MZ833414.1  |    |
| USC-599   | <i>Micromonospora chalcea</i> strain IMB16-203    | 99.76% | MG190678.1  |    |
| USC-6902  | <i>Streptomyces paucisporeus</i> strain WZ092-100 | 98.25% | JF723499.1  |    |
| USC-6902A | <i>Streptomyces</i> sp. B424                      | 99.20% | KJ781978.1  |  |
| USC-6903  | <i>Streptomyces puniceus</i> strain NBRC 12811    | 100%   | MK424311.1  |  |
| USC-6904  | <i>Streptomyces catenulae</i> strain NBRC 12848   | 99.76% | NR_112303.1 |  |

|          |                                                                          |        |            |                                                                                       |
|----------|--------------------------------------------------------------------------|--------|------------|---------------------------------------------------------------------------------------|
| USC-6905 | <i>Streptomyces fradiae</i> strain ES1                                   | 100%   | MG266050.1 |    |
| USC-6906 | <i>Saccharopolyspora erythraea</i> strain NRRL 23338                     | 99.92% | CP069353.1 |    |
| USC-6907 | <i>Streptomyces</i> sp. strain HBUM206419                                | 100%   | MT540570.1 |   |
| USC-6909 | <i>Streptomyces</i> sp. strain ZMR2-66                                   | 100%   | MZ833414.1 |  |
| USC-6910 | <i>Streptomyces</i> sp. strain Ecaf-6                                    | 100%   | MK764948.1 |  |
| USC-6911 | <i>Streptomyces diastaticus</i> subsp. <i>ardesiacus</i> strain 205519-2 | 100%   | MH998230.1 |  |

|           |                                                                 |        |             |                                                                                       |
|-----------|-----------------------------------------------------------------|--------|-------------|---------------------------------------------------------------------------------------|
| USC-6914  | <i>Streptomyces catenulae</i><br>strain NBRC 12848              | 99.92% | NR_112303.1 |    |
| USC-6916  | <i>Streptomyces</i> sp. strain<br>TM-A140                       | 100%   | MH698641.1  |    |
| USC-6917  | <i>Micromonospora</i> sp. strain<br>HNM0611                     | 100%   | MN446732.1  |    |
| USC-6918  | <i>Streptomyces</i><br><i>luozhongensis</i> strain<br>TRM49605  | 100%   | NR_164875.1 |  |
| USC-6919  | <i>Streptomyces</i><br><i>thermocarboxydus</i> strain<br>EGI124 | 100%   | MN704433.1  |  |
| USC-6921A | <i>Streptomyces laurentii</i><br>strain T2-24                   | 100%   | OL584412.1  |  |

|          |                                                      |        |             |                                                                                       |
|----------|------------------------------------------------------|--------|-------------|---------------------------------------------------------------------------------------|
| USC-6922 | <i>Streptomyces laurentii</i><br>strain T2-24        | 100%   | OL584412.1  |    |
| USC-6923 | <i>Streptomyces</i> sp. strain<br>CX3                | 100%   | MN636760.1  |    |
| USC-6924 | <i>Streptomyces</i> sp. Ank245                       | 99.68% | HQ662223.1  |    |
| USC-6925 | <i>Streptomyces drozdowiczii</i><br>DGA8-3           | 100%   | LC536754.1  |  |
| USC-6927 | <i>Streptomyces alni</i> strain<br>D65               | 100%   | NR_043866.1 |  |
| USC-6928 | <i>Streptomyces diastaticus</i><br>strain FJAT-31547 | 100%   | MH0848381.1 |  |

|          |                                                         |        |            |                                                                                       |
|----------|---------------------------------------------------------|--------|------------|---------------------------------------------------------------------------------------|
| USC-6930 | <i>Streptomyces costaricanus</i><br>strain K21C32       | 99.92% | MT124459.1 |    |
| USC-6932 | <i>Streptomyces</i> sp. GX9                             | 100%   | JF830633.1 |    |
| USC-6935 | <i>Streptomyces fumigatiscleroticus</i> strain<br>XY191 | 97.62% | MH432668.1 |    |
| USC-6953 | <i>Streptomyces cirratus</i><br>strain HW276-2          | 100%   | ON738616.1 |  |

**Table S2.** Assigned GenBank accession numbers of the actinomycete isolates

| Strain Code | GenBank accession numbers |
|-------------|---------------------------|
| USC-590     | OQ740099                  |
| USC-591     | OQ740100                  |
| USC-592     | OQ740101                  |
| USC-593     | OQ740102                  |
| USC-595A    | OQ740103                  |
| USC-595B    | OQ740104                  |
| USC-595C    | OQ740105                  |
| USC-596     | OQ740106                  |
| USC-597     | OQ740107                  |
| USC-598     | OQ740108                  |
| USC-599     | OQ740109                  |
| USC-6902    | OQ740110                  |
| USC-6902A   | OQ740111                  |
| USC-6903    | OQ740112                  |
| USC-6904    | OQ740113                  |
| USC-6905    | OQ740114                  |
| USC-6906    | OQ740115                  |
| USC-6907    | OQ740116                  |
| USC-6909    | OQ740117                  |
| USC-6910    | OQ740118                  |
| USC-6911    | OQ740119                  |
| USC-6914    | OQ740120                  |
| USC-6916    | OQ740121                  |
| USC-6917    | OQ740122                  |
| USC-6918    | OQ740123                  |
| USC-6919    | OQ740124                  |
| USC-6921A   | OQ740125                  |
| USC-6922    | OQ740126                  |
| USC-6923    | OQ740127                  |
| USC-6924    | OQ740128                  |
| USC-6925    | OQ740129                  |
| USC-6927    | OQ740130                  |
| USC-6928    | OQ740131                  |
| USC-6930    | OQ740132                  |
| USC-6932    | OQ740133                  |
| USC-6935    | OQ740134                  |
| USC-6953    | OQ740135                  |



## Figures:

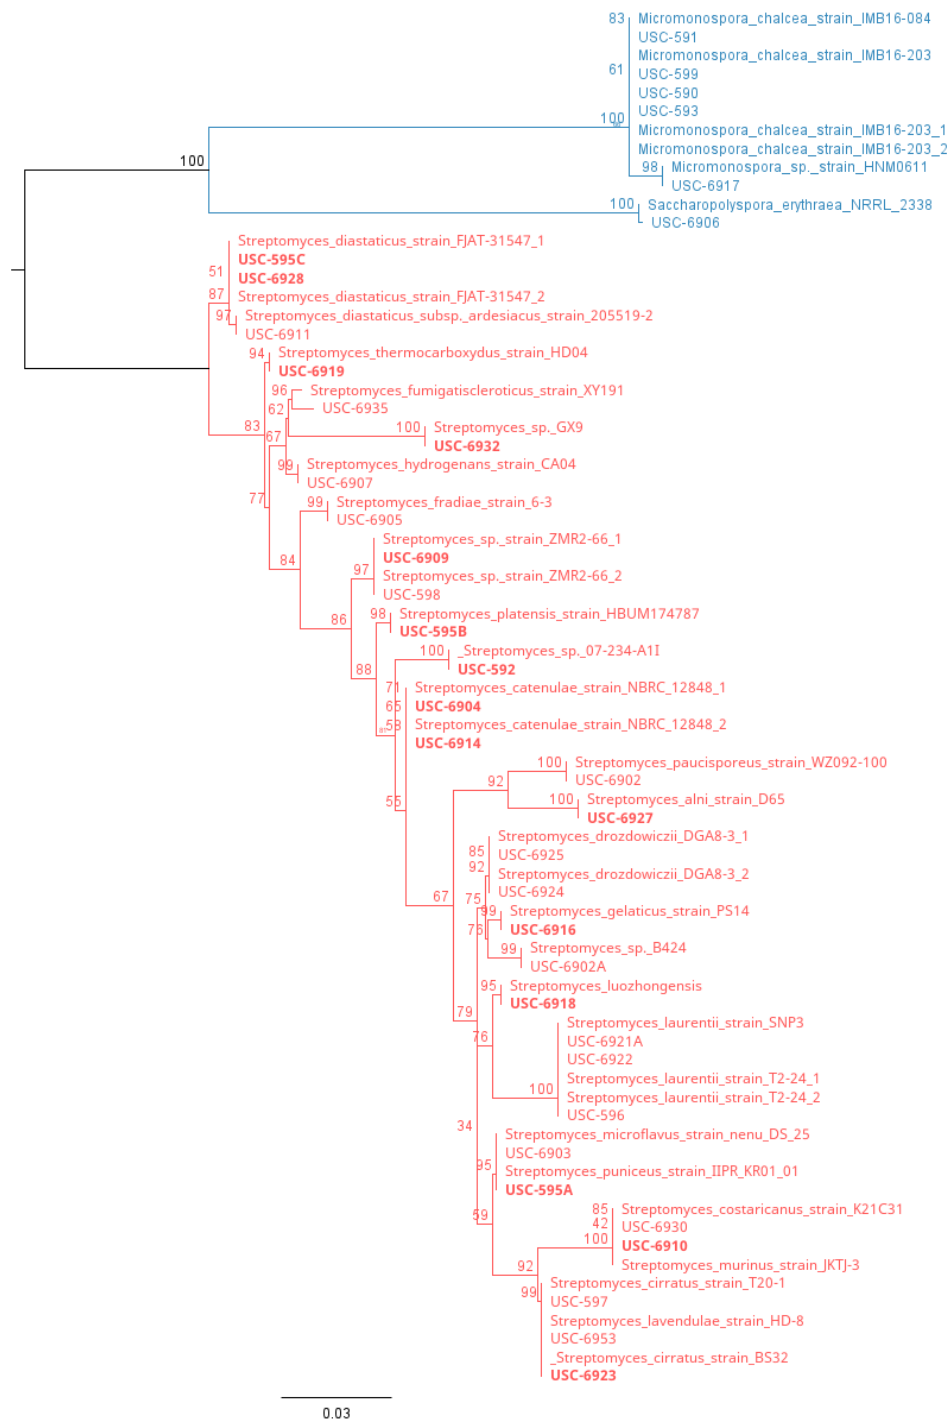

**Figure S1.** Phylogenetic relationship between actinomycetes previously isolated from the gut of termites and 37 global reference strains. The midpoint-rooted maximum likelihood phylogenetic tree was constructed using IQTREE2. The actinomycete sequences were named as per their corresponding GenBank accession number (Supplementary Materials) and coloured based on their genus. The second clade in red represents the genus *Streptomyces*, and the sequences investigated in this study are shown in bold. Bootstrap values are presented as a percentage, and the scale bar is indicative of the number of nucleotide substitutions per site.

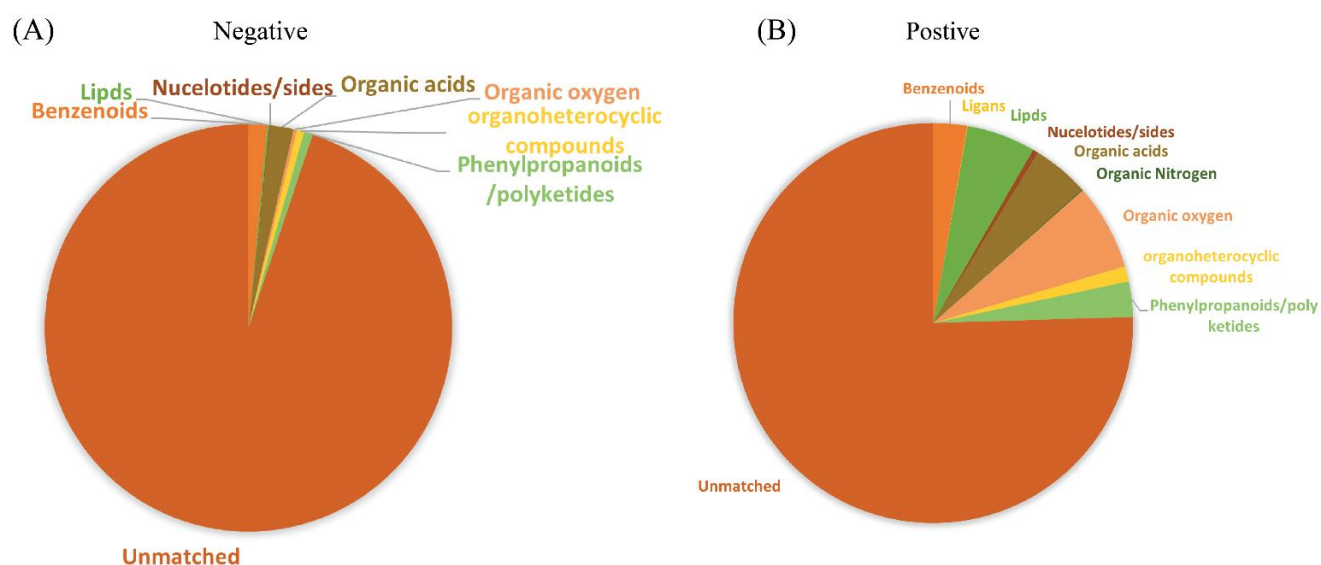

**Figure S2.** Metabolite chemical class distribution within the (A) positive molecular network and (B) negative molecular network.

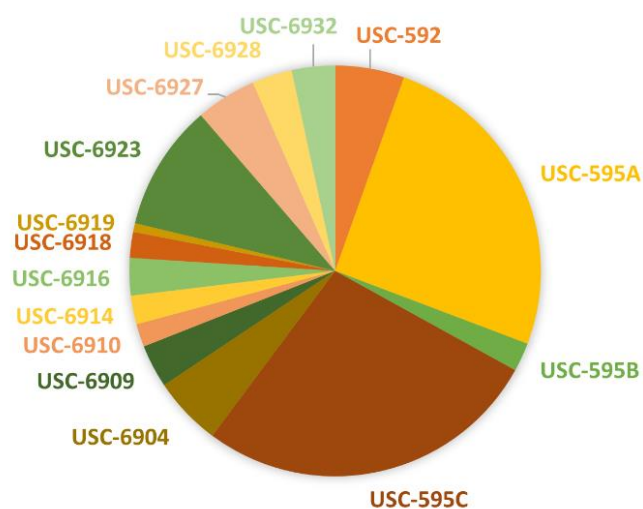

**Figure S3.** Distribution of polyketide metabolites across the fermentation extracts of streptomycetes.
